# Supplementary material
Source: PubMed Central journal article supplement (PMC6664181)
Supplement: supp_RA119.008986_145042_1_supp_327174_prlzqg.pdf [file supp_RA119.008986_145042_1_supp_327174_prlzqg.pdf]

## SUPPORTING INFORMATION

The abundant DNA adduct  $N^7$ -methyl deoxyguanosine miscodes during replication by human DNA polymerase  $\eta$

Olive J. Njuma, Yan Su, and F. Peter Guengerich

### CONTENTS

**SCHEME 1. Synthesis of  $N^7$ -CH<sub>3</sub> 2'-F dG-containing oligonucleotide.**

**FIGURE S1. NMR spectra for product of step 1 of synthesis of  $N^7$ -CH<sub>3</sub> 2'-F dG-containing oligonucleotide.**

**FIGURE S2. NMR spectra for product of step 2 of synthesis of  $N^7$ -CH<sub>3</sub> 2'-F dG-containing oligonucleotide.**

**FIGURE S3. COSY, HSQC, and HMBC NMR spectra for product of step 2 of synthesis of  $N^7$ -CH<sub>3</sub> 2'-F dG-containing oligonucleotide.**

**FIGURE S4. NMR spectra for product of step 3 of synthesis of  $N^7$ -CH<sub>3</sub> 2'-F dG-containing oligonucleotide.**

**FIGURE S5: <sup>31</sup>P NMR spectrum for product of step 4 of synthesis of  $N^7$ -CH<sub>3</sub> 2'-F dG-containing oligonucleotide and LC-ESI-MS analysis of 2'-F dG DNA oligonucleotide.**

**FIGURE S6: Mass spectra and gel analysis of  $N^7$ -CH<sub>3</sub> 2'-F dG-containing oligonucleotide.**

**FIGURE S7. Representative gels for steady-state kinetic analysis of single-nucleotide incorporation across dG, 2'-F dG, and  $N^7$ -CH<sub>3</sub> 2'-F dG by hpol  $\eta$ .**

**FIGURE S8. Steady-state kinetic analysis of individual dATP, dCTP, and dGTP insertions by Dpo4**

**FIGURE S9. Steady-state kinetic analysis of individual dTTP insertions by Dpo4**

**FIGURE S10. Gel analysis for single nucleotide extension from 2'-F dG:dC and 2'-F dG:dT base-pairs and from  $N^7$ -CH<sub>3</sub> 2'-F dG:dC and  $N^7$ -CH<sub>3</sub> 2'-F dG:dT base-pairs.**

**FIGURE S11. LC-MS sequence analysis of extension products opposite  $N^7$ -CH<sub>3</sub> 2'-F dG with hpol  $\eta$ .**

**FIGURE S12. LC-MS sequence analysis of extension products opposite  $N^7$ -CH<sub>3</sub> 2'-F dG with hpol  $\eta$ .**

**TABLE S1. Observed and theoretical CID ions of the 5'-pTCATGA-3' extension product with hpol  $\eta$ .**

**TABLE S2. Observed and theoretical CID ions of the 5'-pTACTGA-3' extension product with hpol  $\eta$ .**

**TABLE S3. Observed and theoretical CID ions of the 5'-pTACT-3' extension (stalled) product with hpol  $\eta$ .**

**TABLE S4. Observed and theoretical CID ions of the 5'-pTCATGAT-3' extension product with hpol  $\eta$ .**

**TABLE S5. Observed and theoretical CID ions of the 5'-pTAGTCAT-3' extension product with hpol  $\eta$ .**

**TABLE S6. Observed and theoretical CID ions of the 5'-pTGATCAT-3' extension product with hpol  $\eta$ .**

Scheme 1

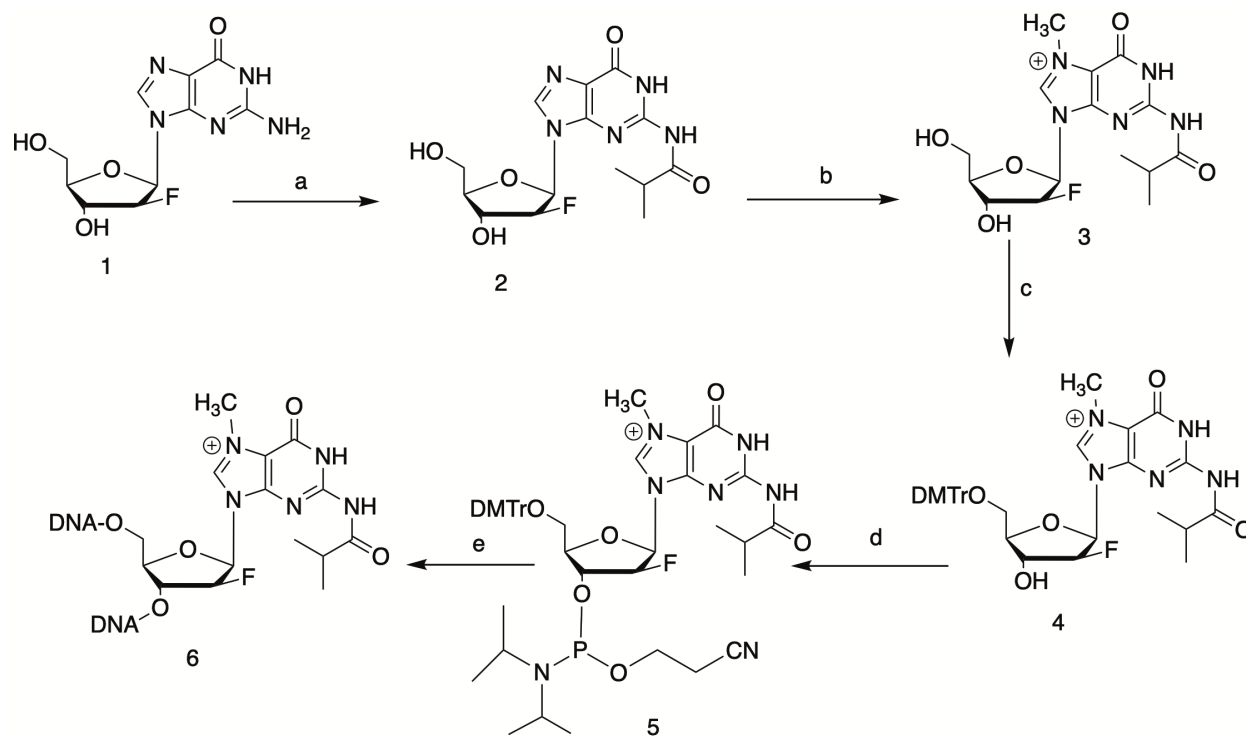

**SCHEME 1. Synthesis of *N*<sup>7</sup>-CH<sub>3</sub> 2'-F dG-containing oligonucleotide.** Reagents and conditions (all reactions were done at room temperature). (a) (i) chlorotrimethylsilane, pyridine, 2 h; (ii) isobutyryl chloride, 3 h, 80%; (b) CH<sub>3</sub>I, *N,N*-dimethylformamide (DMF), 22 h, 80%; (c) 4,4',4''-trimethoxytrityl (DMT) chloride, *N,N*-diisopropylethylamine, pyridine, 2 h, 60 %; (d) 2-cyano-*N,N,N,N*-tetraisopropyl phosphane, tetrazole, CH<sub>2</sub>Cl<sub>2</sub>, 2 h, 68%; (e) solid phase DNA synthesis. (1, 2).

**A**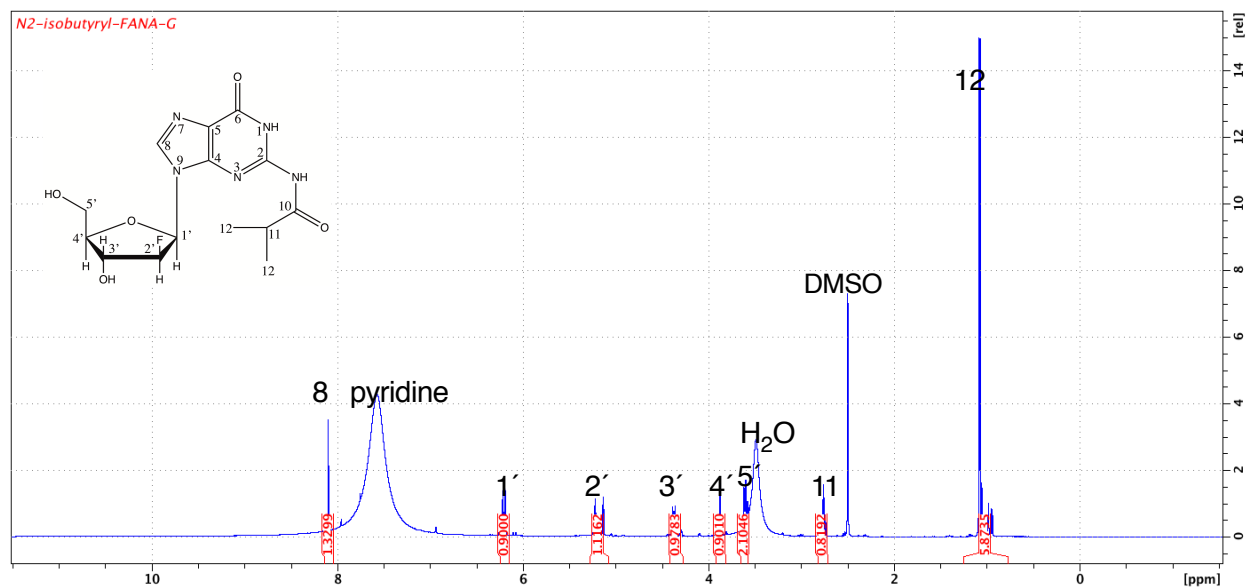**B**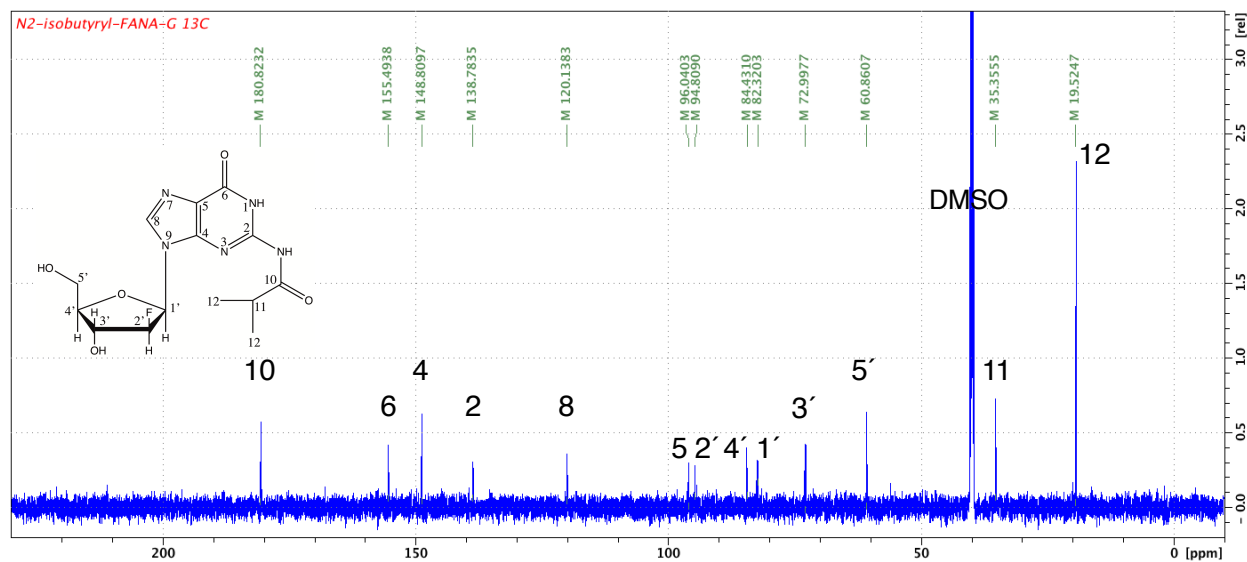

FIGURE S1. NMR spectra for product of step 1 of synthesis of *N*<sup>7</sup>-CH<sub>3</sub> 2'-F dG-containing oligonucleotide. A, <sup>1</sup>H-spectrum; B, <sup>13</sup>C-spectrum.

A

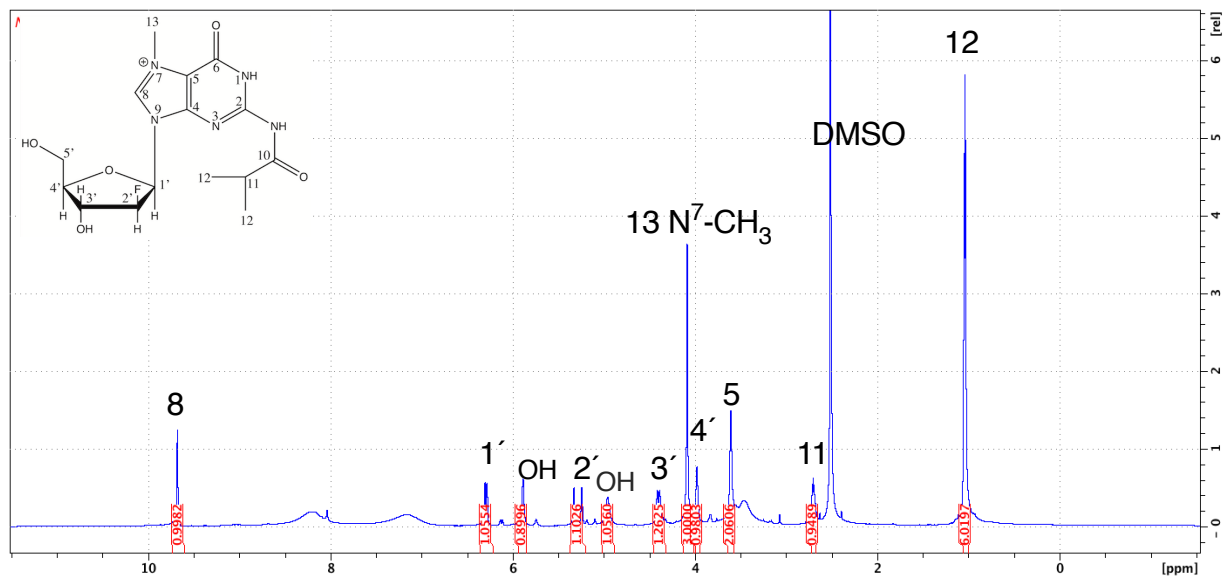

B

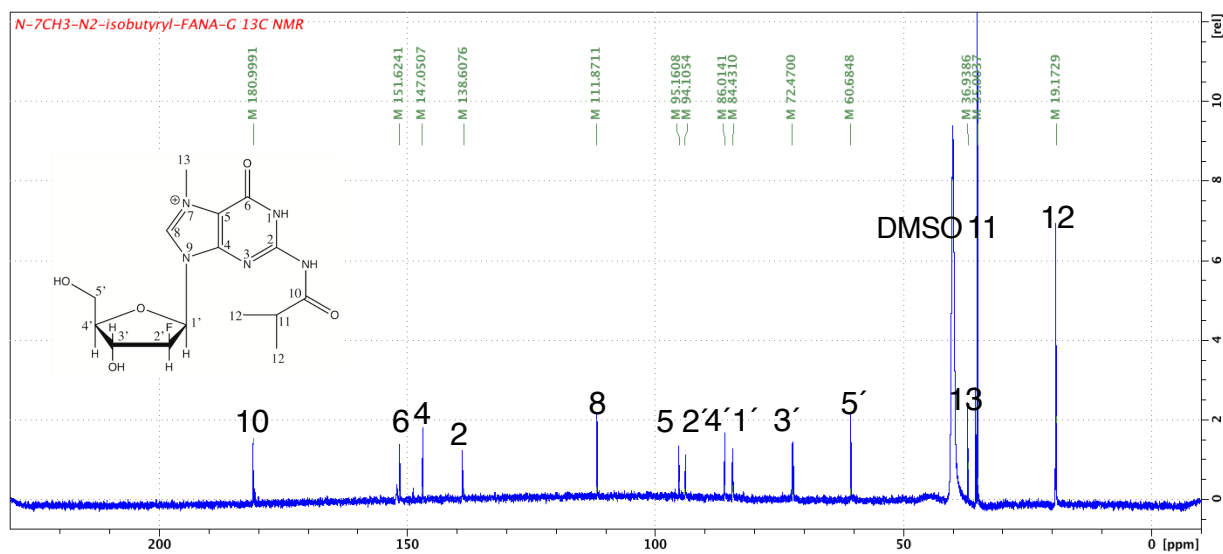

FIGURE S2. NMR spectra for product of step 2 of synthesis of  $N^7$ - $\text{CH}_3$  2'-F dG-containing oligonucleotide. A,  $^1\text{H}$ -spectrum; B,  $^{13}\text{C}$ -spectrum.

Fig. S3

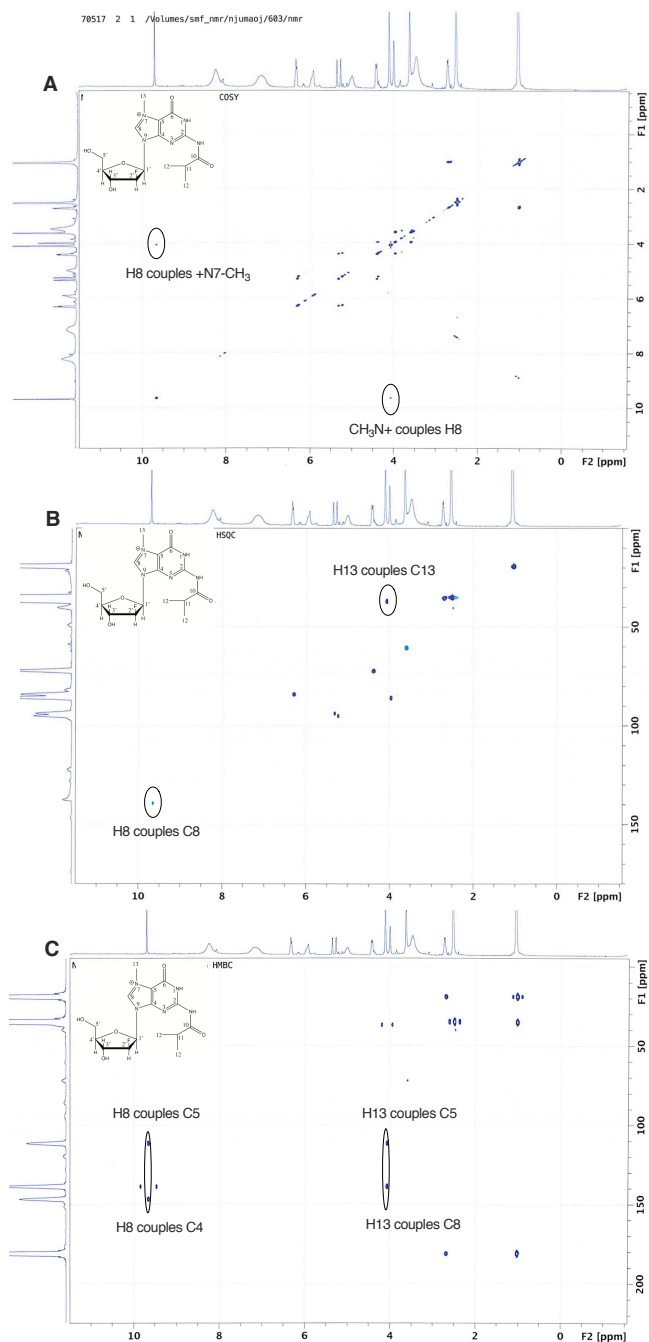

FIGURE S3. COSY, HSQC, and HMBC NMR spectra for product of step 2 of synthesis of *N*<sup>7</sup>-CH<sub>3</sub> 2'-F dG-containing oligonucleotide. A, COSY (homonuclear correlation spectroscopy); B, HSQC (heteronuclear single quantum coherence spectroscopy) ; C, HMBC (heteronuclear multiple bond correlation spectroscopy).

A

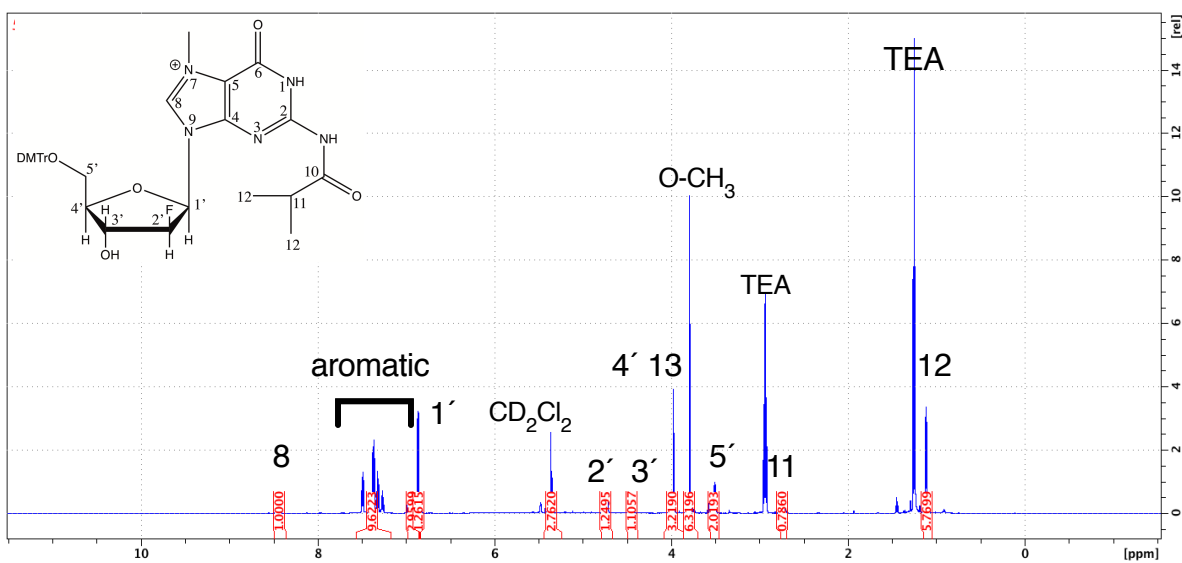

B

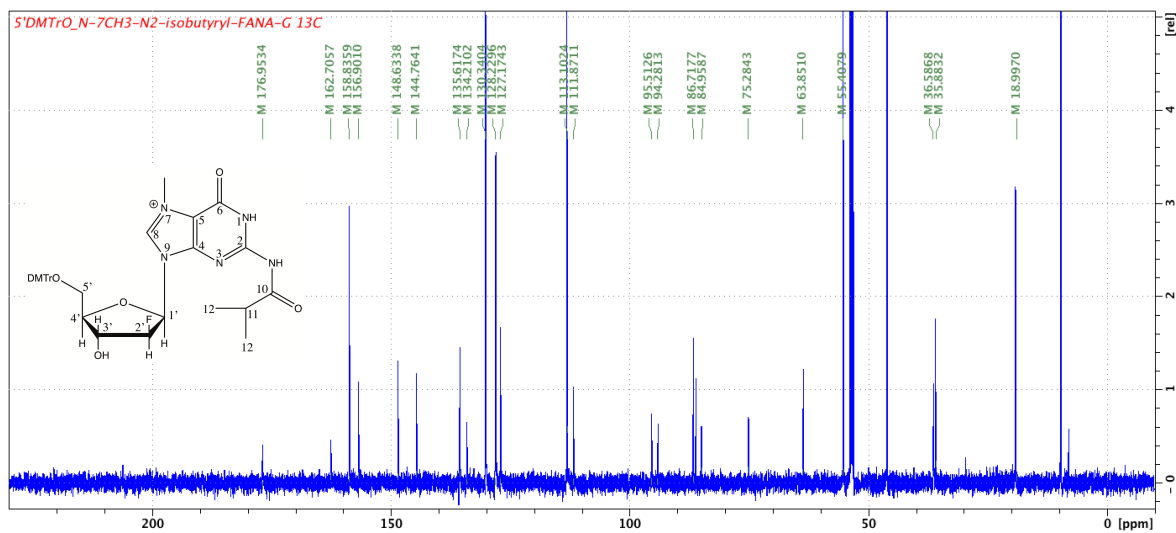

FIGURE S4. NMR spectra for product of step 3 of synthesis of  $N^7$ -CH<sub>3</sub> 2'-F dG-containing oligonucleotide. A, <sup>1</sup>H-spectrum; B, <sup>13</sup>C-spectrum.

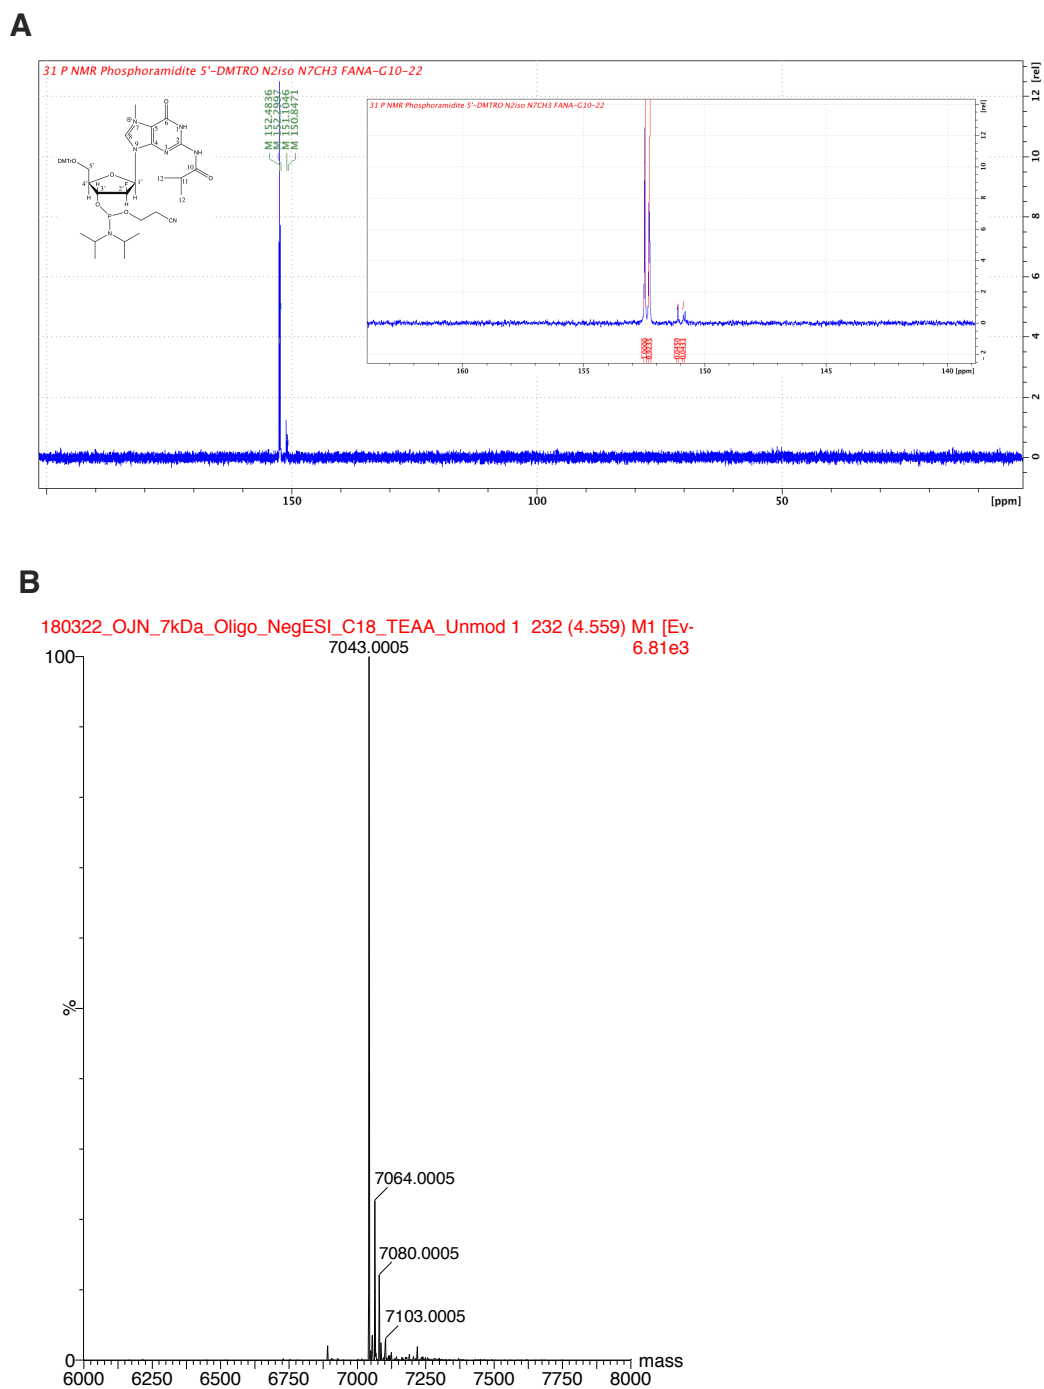

FIGURE S5: A, <sup>31</sup>P NMR spectrum for product of step 4 of synthesis of *N*<sup>7</sup>-CH<sub>3</sub> 2'-F dG-containing oligonucleotide; B, LC-ESI-MS analysis of 2'-F dG-containing oligonucleotide.



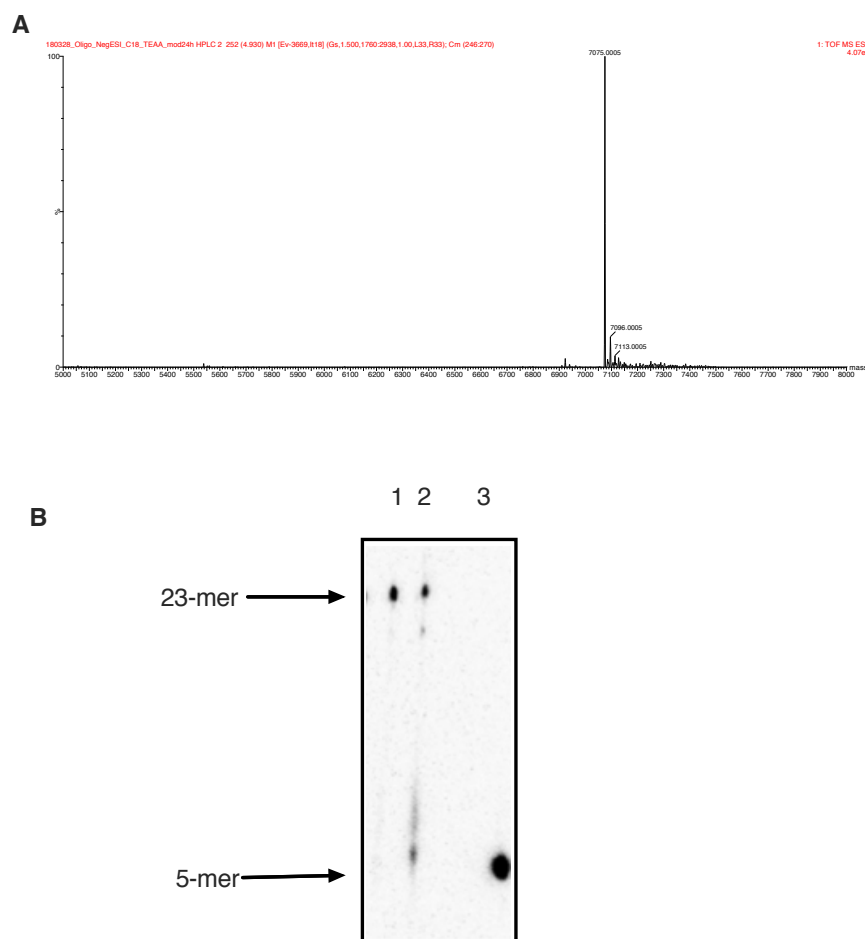

**FIGURE S6: Mass spectra and gel analysis of  $N^7$ -CH<sub>3</sub> 2'-FdG-containing oligonucleotide.** *A*, LC-ESI-MS analysis of  $N^7$ -CH<sub>3</sub> 2'-F dG-containing oligonucleotide; *B*, gel showing FPG glycosylase treatment of  $N^7$ -CH<sub>3</sub> 2'-F dG-containing oligonucleotide. Lane 1,  $N^7$ -CH<sub>3</sub> 2'-F dG-containing template, annealed, and treated with FPG glycosylase; lane 2,  $N^7$ -CH<sub>3</sub> 2'-F dG-containing template treated with NaOH, annealed, and treated with FPG glycosylase; lane 3, 5-mer standard (3'-GTACT-5'). The sequence used for the 23-mer was 3'-GCCCGAGCATTTCGCAGTAXTACT-5', where X is  $N^7$ -CH<sub>3</sub> 2'-F dG, which was annealed to its complementary sequence.

5' - /FAM/CGGGCTCGTAAGCGTCAT  
 3' - GCCCGAGCATTTCGCAGTAXTACT

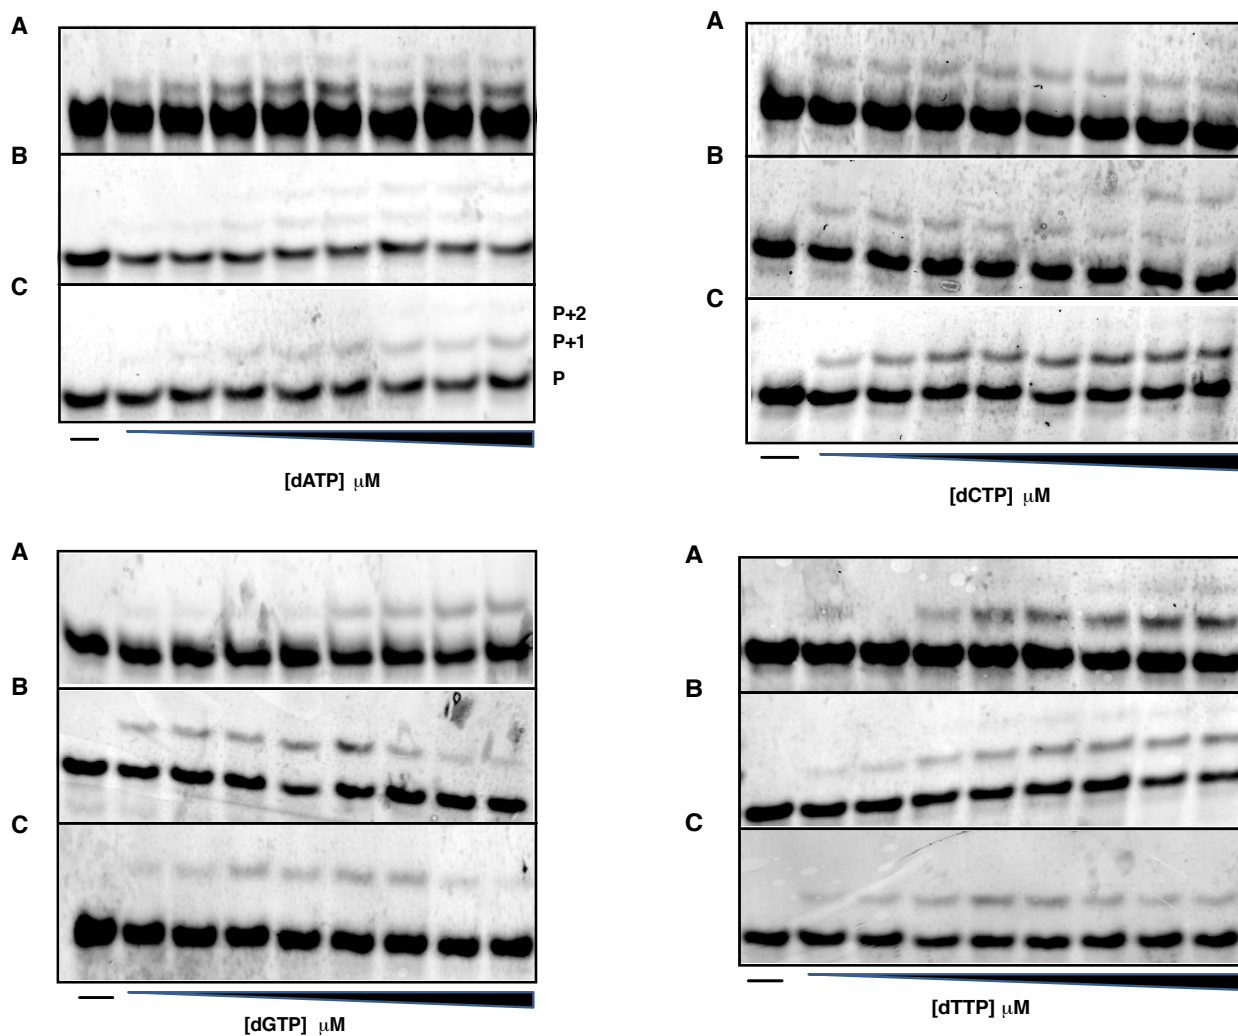

FIGURE S7. **Representative gels for steady-state kinetic analysis of single-nucleotide incorporation across dG, 2'-F dG,  $N^7$ -CH<sub>3</sub> 2'-F dG by hpol  $\eta$ .** A, dG; B, 2'-F dG; and C,  $N^7$ -CH<sub>3</sub> 2'-F dG. Reactions were done at 37 °C for 5-10 min by incubating 120 nM primer-template DNA complex, 2.5-10 nM hpol  $\eta$ , and varying concentrations of the indicated dNTP: ([dATP] 5-250  $\mu$ M, [dCTP] 0.25-100  $\mu$ M, [dGTP] 2.5-200  $\mu$ M, and [dTTP] 5-200  $\mu$ M).

Fig. S8

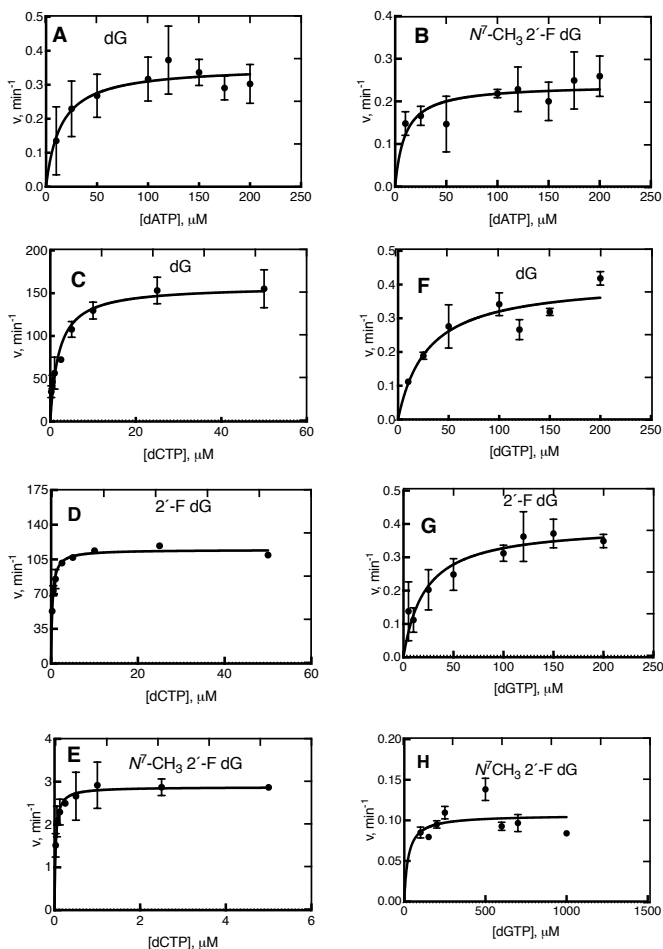

**FIGURE S8. Steady-state kinetic analysis of individual dATP, dCTP, and dGTP insertions by Dpo4.** Reactions contained templates dG (panels A, C and F), 2'-F dG (panels D and G), and  $N^7$ -CH<sub>3</sub> 2'-F dG (panels B, E, and H) at position X in the sequences 5'-CGGGCTCGTAAGCGTCAT-3' and 3'-GCCCCGAGCATTCGCAGTAXTACT-5'. Reactions were done at 37 °C for 5-10 min by incubating 120 nM primer-template oligonucleotide complex, 0.15-10 nM Dpo4, and varying concentrations of dATP, dCTP and dGTP. Fitting was to a hyperbolic equation in GraphPad Prism v.8.0, CA, and  $k_{cat}$  and  $K_m$  values are presented in Table1.

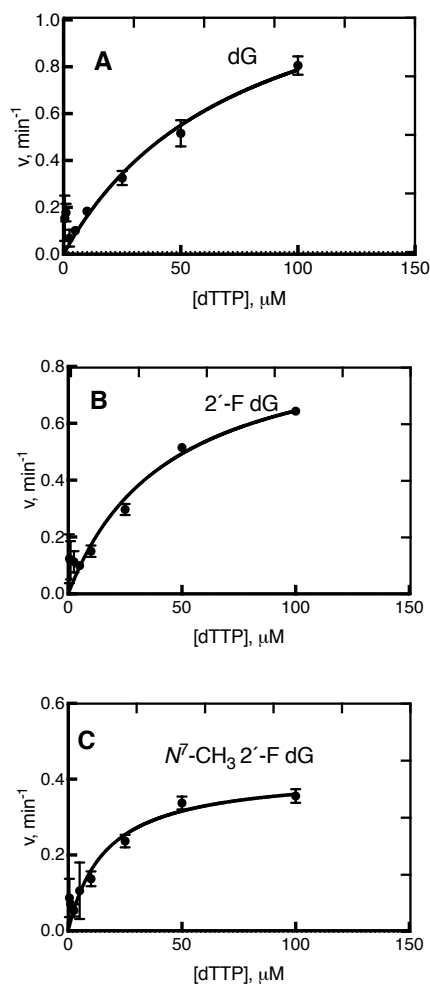

**FIGURE S9. Steady-state kinetic analysis of individual dTTP insertions by Dpo4.** Reactions contained templates dG (panel A), 2'-F dG (panel B), and  $N^7\text{-CH}_3$  2'-F dG (panel C) at position X in the sequences 5'-CGGGCTCGTAAGCGTCAT-3' and 3'-GCCCGAGCATTTCGAGTAXTACT-5'. Reactions were done at 37 °C for 3-10 min by incubating 120 nM primer-template oligonucleotide complex, 0.15-10 nM Dpo4, and varying concentrations of dATP, dCTP and dGTP. Fitting was to a hyperbolic equation in GraphPad Prism v.8.0, CA, and  $k_{\text{cat}}$  and  $K_m$  values are presented in Table 2.

5' - /FAM/CGGGCTCGTAAGCGTCATC  
 3' - GCCCGAGCATTTCGCAGTAXTACT

5' - /FAM/CGGGCTCGTAAGCGTCATT  
 3' - GCCCGAGCATTTCGCAGTAXTACT

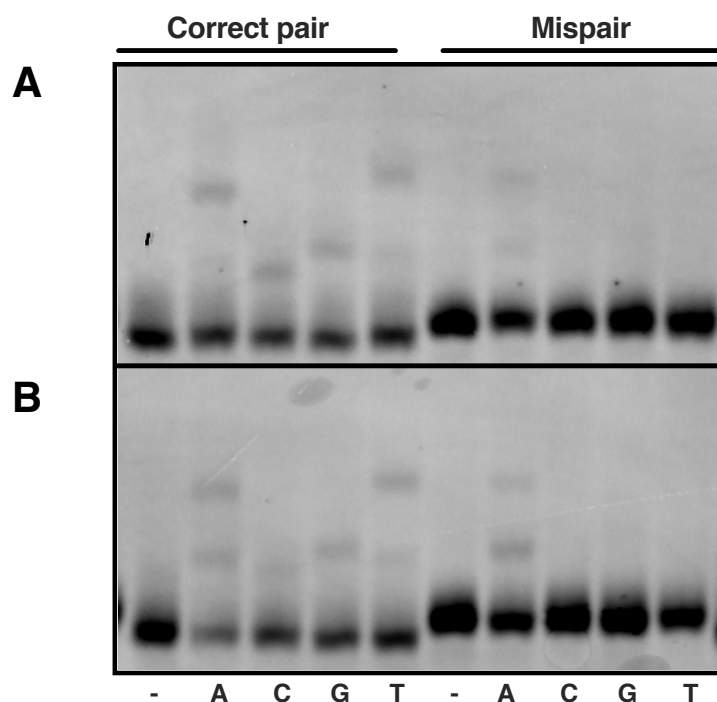

FIGURE S10. Gel analysis for single nucleotide extension from 2'-F dG:dC and 2'-F dG:dT base-pairs and from *N*<sup>7</sup>-CH<sub>3</sub> 2'-F dG:dC and *N*<sup>7</sup>-CH<sub>3</sub> 2'-F dG:dT base-pairs. A, 2'-F dG:dC and 2'-F dG:dT; B, *N*<sup>7</sup>-CH<sub>3</sub> 2'-F dG:dC and *N*<sup>7</sup>-CH<sub>3</sub> 2'-F dG:dT. Reactions were conducted with 120 nM FAM-labeled primer-template DNA complex, 250 μM dNTPs, and 5 nM hpol η for 5 minutes.

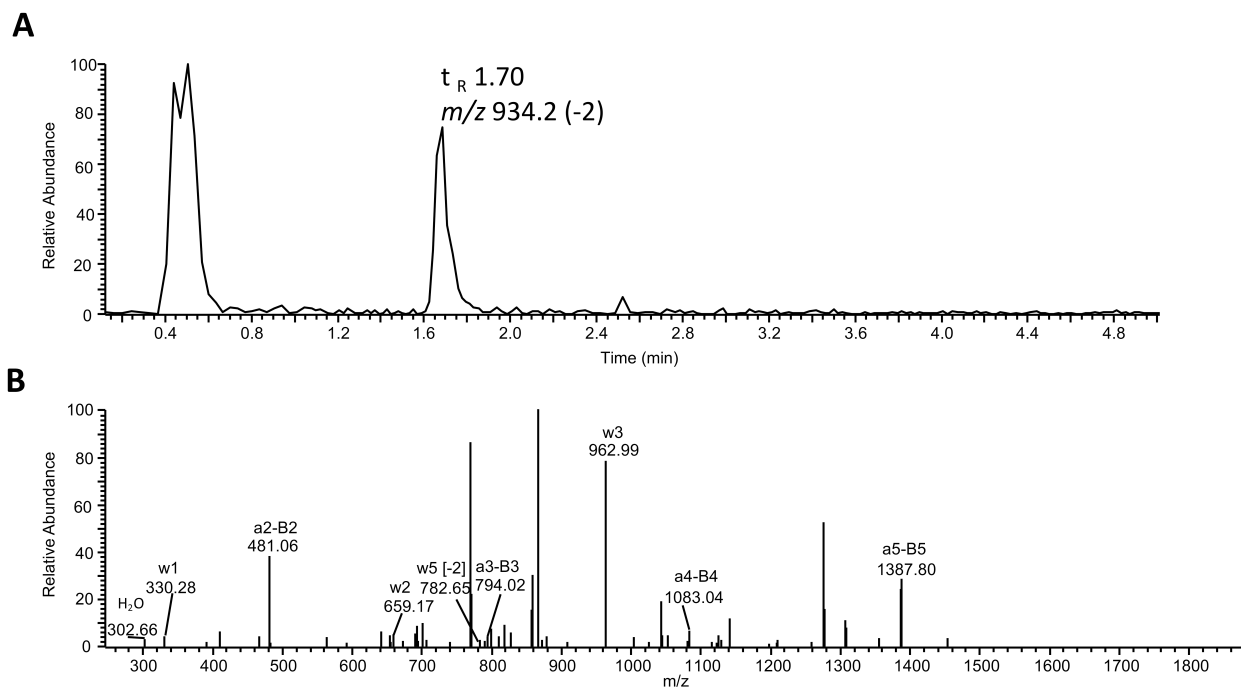

FIGURE S11. LC-MS sequence analysis of extension products opposite  $N^7$ -CH<sub>3</sub> 2'-F dG with **hpol**  $\eta$ . **A**, extracted ion chromatograms of product ions at  $m/z$  934.2 (-2) (misincorporation of A); **B**, CID spectrum of  $m/z$  934.

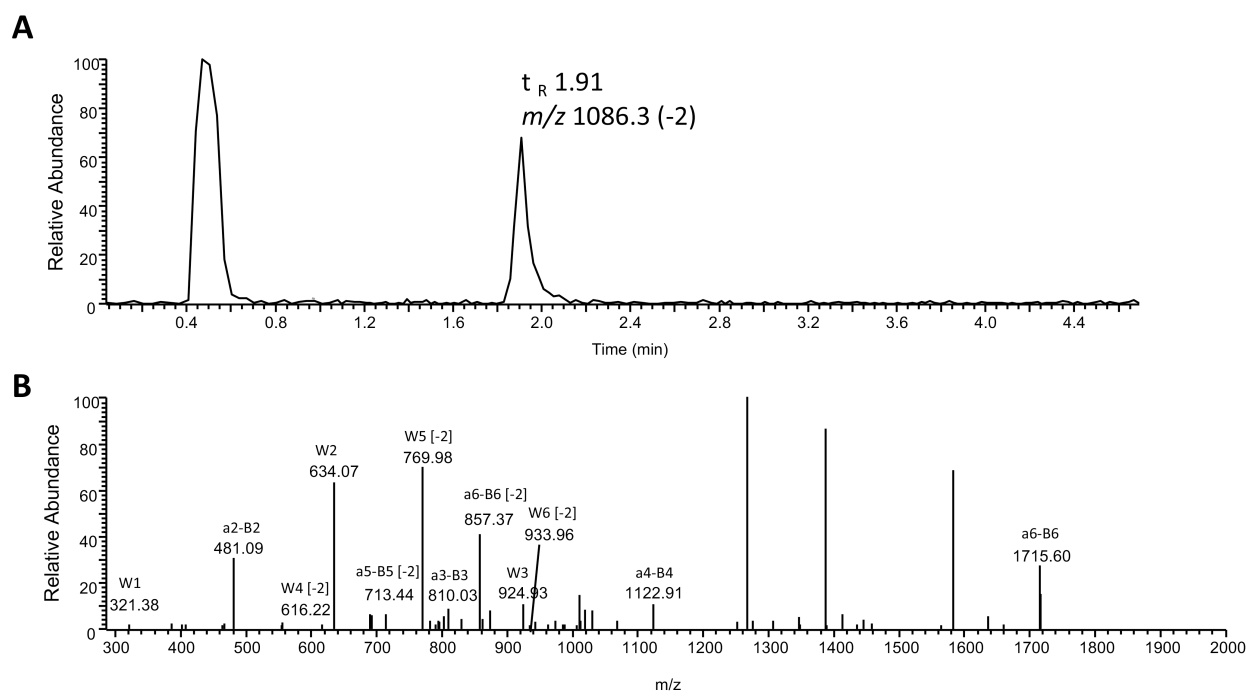

FIGURE S12. LC-MS sequence analysis of extension products opposite  $N^7$ -CH<sub>3</sub> 2'-F dG with hpol  $\eta$ . *A*, extracted ion chromatogram of product ions at  $m/z$  1086.3 (-2) (misincorporation of G); *B*, CID spectrum of  $m/z$  1086.3.

TABLE S1. Observed and theoretical CID ions of the 5'-pTCATGA-3' extension product with hpol  $\eta$  ( $m/z$  934.3)

| Fragmentation assignment                   | $m/z$ , observed (charge) | $m/z$ , theoretical (charge) |
|--------------------------------------------|---------------------------|------------------------------|
| 5'-pT (a <sub>2</sub> -B <sub>2</sub> )    | 481.06                    | 481.27                       |
| 5'-pTC (a <sub>3</sub> -B <sub>3</sub> )   | 769.99                    | 770.46                       |
| 5'-pTCA (a <sub>4</sub> -B <sub>4</sub> )  | 1083.04                   | 1083.67                      |
| 5'-pTCAT (a <sub>5</sub> -B <sub>5</sub> ) | 1387.80                   | 1387.87                      |
| pCATGA-3' (w <sub>5</sub> , -2)            | 782.65 (2)                | 782.51 (2)                   |
| pATGA-3' (w <sub>4</sub> )                 | 1275.94                   | 1276.83                      |
| pTGA-3' (w <sub>3</sub> )                  | 962.99                    | 963.62                       |
| pGA-3' (w <sub>2</sub> )                   | 659.17                    | 659.43                       |
| pA-3' (w <sub>1</sub> )                    | 330.28                    | 330.22                       |

**TABLE S2. Observed and theoretical CID ions of the 5'-pTACTGA-3' extension product with hpol  $\eta$  ( $m/z$  934.3)**

| Fragmentation assignment                   | $m/z$ , observed | $m/z$ , theoretical |
|--------------------------------------------|------------------|---------------------|
| 5'-pT (a <sub>2</sub> -B <sub>2</sub> )    | 481.06           | 481.27              |
| 5'-pTA (a <sub>3</sub> -B <sub>3</sub> )   | 794.02           | 794.48              |
| 5'-pTAC (a <sub>4</sub> -B <sub>4</sub> )  | 1083.04          | 1083.67             |
| 5'-pTACT (a <sub>5</sub> -B <sub>5</sub> ) | 1387.80          | 1387.87             |
| pACTGA-3' (w <sub>5</sub> , -2)            | 782.65 (2)       | 782.51 (2)          |
| pTGA-3' (w <sub>3</sub> )                  | 962.99           | 963.62              |
| pGA-3' (w <sub>2</sub> )                   | 659.17           | 659.43              |
| pA-3' (w <sub>1</sub> )                    | 330.28           | 330.22              |

**TABLE S3. Observed and theoretical CID ions of the 5'-pTACT-3' extension stalled product with hpol  $\eta$  ( $m/z$  613.2).**

| Fragmentation assignment                 | $m/z$ , observed | $m/z$ , theoretical |
|------------------------------------------|------------------|---------------------|
| 5'-pT (a <sub>2</sub> -B <sub>2</sub> )  | 481.06           | 481.27              |
| 5'-pTC (a <sub>3</sub> -B <sub>3</sub> ) | 770.0            | 770.46              |
| pCAT-3' (w <sub>3</sub> )                | 923.90           | 923.60              |
| pAT-3' (w <sub>2</sub> )                 | 634.23           | 634.41              |
| pT-3' (w <sub>1</sub> )                  | 321.07           | 321.20              |



**TABLE S4. Observed and theoretical CID ions of the 5'-pTCATGAT-3' extension product with hpol  $\eta$  ( $m/z$  1086.2).**

| Fragmentation assignment                    | $m/z$ , observed (charge) | $m/z$ , theoretical (charge) |
|---------------------------------------------|---------------------------|------------------------------|
| 5'-pT (a <sub>2</sub> -B <sub>2</sub> )     | 481.20                    | 481.27                       |
| 5'-pTC (a <sub>3</sub> -B <sub>3</sub> )    | 770.13                    | 770.45                       |
| 5'-pTCAT (a <sub>5</sub> -B <sub>5</sub> )  | 1387.77                   | 1387.87                      |
| 5'-pTCATG (a <sub>6</sub> -B <sub>6</sub> ) | 1716.94                   | 1717.08                      |
| pCATGAT-3' (w <sub>6</sub> , -2)            | 933.96 (-2)               | 934.6 (-2)                   |
| pATGAT-3' (w <sub>5</sub> , -2)             | 1579.94                   | 1581.03                      |
| pTGAT-3' (w <sub>4</sub> )                  | 1267.75                   | 1267.82                      |
| pGAT-3' (w <sub>3</sub> )                   | 962.91                    | 963.62                       |
| pAT-3' (w <sub>2</sub> )                    | 634.07                    | 634.41                       |
| pT-3' (w <sub>1</sub> )                     | 321.38                    | 321.20                       |

**TABLE S5. Observed and theoretical CID ions of the 5'-pTAGTCAT-3' extension product with hpol  $\eta$  ( $m/z$  1086.2).**

| Fragmentation assignment                    | $m/z$ , observed (charge) | $m/z$ , theoretical (charge) |
|---------------------------------------------|---------------------------|------------------------------|
| 5'-pT (a <sub>2</sub> -B <sub>2</sub> )     | 481.20                    | 481.27                       |
| 5'-pTA (a <sub>3</sub> -B <sub>3</sub> )    | 794.22                    | 794.48                       |
| 5'-pTAG (a <sub>4</sub> -B <sub>4</sub> )   | 1122.91                   | 1123.69                      |
| 5'-pTAGT (a <sub>5</sub> -B <sub>5</sub> )  | 713.44 (-2)               | 713.44 (-2)                  |
| 5'-pTAGTC (a <sub>6</sub> -B <sub>6</sub> ) | 1716.94, 858.18 (-2)      | 1717.08, 858.03 (-2)         |
| pTAGTA-3' (w <sub>6</sub> , -2)             | 933.96 (-2)               | 934.6 (-2)                   |
| pTCAT-3' (w <sub>4</sub> , -2)              | 616.22 (-2)               | 613.39 (-2)                  |
| pCAT-3' (w <sub>3</sub> )                   | 924.93                    | 923.60                       |
| pAT-3' (w <sub>2</sub> )                    | 634.07                    | 634.41                       |
| pT-3' (w <sub>1</sub> )                     | 321.38                    | 321.20                       |

**TABLE S6. Observed and theoretical CID ions of the 5'-pTGATCAT-3' extension product by hpol  $\eta$  ( $m/z$  1086.2).**

| Fragmentation assignment                    | $m/z$ , observed (charge) | $m/z$ , theoretical (charge) |
|---------------------------------------------|---------------------------|------------------------------|
| 5'-pT (a <sub>2</sub> -B <sub>2</sub> )     | 481.20                    | 481.27                       |
| 5'-pTG (a <sub>3</sub> -B <sub>3</sub> )    | 810.03                    | 810.48                       |
| 5'-pTGA (a <sub>4</sub> -B <sub>4</sub> )   | 1122.91                   | 1123.69                      |
| 5'-pTGAT (a <sub>5</sub> -B <sub>5</sub> )  | 713.44 (-2)               | 713.44 (-2)                  |
| 5'-pTGATC (a <sub>6</sub> -B <sub>6</sub> ) | 1716.94, 858.18 (-2)      | 1717.08, 858.03 (-2)         |
| pGATCAT-3' (w <sub>6</sub> , -2)            | 933.96 (-2)               | 934.6 (-2)                   |
| pATCAT-3' (w <sub>5</sub> , -2)             | 769.88 (-2)               | 769.99 (-2)                  |
| pTCAT-3' (w <sub>4</sub> , -2)              | 616.22 (-2)               | 613.39 (-2)                  |
| pCAT-3' (w <sub>3</sub> )                   | 924.93                    | 923.60                       |
| pAT-3' (w <sub>2</sub> )                    | 634.07                    | 634.41                       |
| pT-3' (w <sub>1</sub> )                     | 321.38                    | 321.20                       |

## References

1. Wilson, T. J., Li, N. S., Lu, J., Frederiksen, J. K., Piccirilli, J. A., and Lilley, D. M. (2010) Nucleobase-mediated general acid-base catalysis in the Varkud satellite ribozyme. *Proc. Natl. Acad. Sci. U. S. A.* **107**, 11751-11756
2. Lee, S., Bowman, B. R., Ueno, Y., Wang, S., and Verdine, G. L. (2008) Synthesis and structure of duplex DNA containing the genotoxic nucleobase lesion  $N^7$ -methylguanine. *J. Am Chem. Soc.* **130**, 11570-11571
